# Supplementary material for: Synthesis, Structure and Biological Activity of Indole–Imidazole Complexes with ZnCl2: Can Coordination Enhance the Functionality of Bioactive Ligands?
Source: MDPI journal article supplement (doi:10.3390/molecules28104132), 2023-05-16
Supplement: s1 [file s1]

## Supplementary data

### Synthesis, structure and biological activity of indole-imidazole complexes with ZnCl<sub>2</sub>: can coordination enhance functionality of bioactive ligands?

Karolina Babijczuk<sup>1</sup>, Beata Warżajtis<sup>2</sup>, Justyna Starzyk<sup>3</sup>, Lucyna Mrówczyńska<sup>4</sup>, Beata Jasiewicz<sup>1\*</sup> and Urszula Rychlewska<sup>2\*</sup>

<sup>1</sup>Department of Bioactive Products, Faculty of Chemistry, Adam Mickiewicz University, Uniwersytetu Poznańskiego 8, 61-614 Poznań, Poland,

<sup>2</sup>Department of Crystallography, Faculty of Chemistry, Adam Mickiewicz University, Uniwersytetu Poznańskiego 8, 61-614 Poznań, Poland,

<sup>3</sup>Department of Soil Science and Microbiology, Faculty of Agronomy, Horticulture, and Bioengineering, University of Life Science, Szydlowska 50, 60-656 Poznań, Poland,

<sup>4</sup>Department of Cell Biology, Faculty of Biology, Adam Mickiewicz University, Uniwersytetu Poznańskiego 6, 61-614 Poznań, Poland,

## TABLE OF CONTENTS

|                                                                           |     |
|---------------------------------------------------------------------------|-----|
| <sup>1</sup> H and <sup>13</sup> C NMR spectra of complex <b>1</b> .....  | S2  |
| IR and ESI-MS spectra of complex <b>1</b> .....                           | S3  |
| <sup>1</sup> H and <sup>13</sup> C NMR spectra of complex <b>2</b> .....  | S4  |
| IR and ESI-MS spectra of complex <b>2</b> .....                           | S5  |
| <sup>1</sup> H and <sup>13</sup> C NMR spectra of complex <b>3</b> .....  | S6  |
| IR and ESI-MS spectra of complex <b>3</b> .....                           | S7  |
| <sup>1</sup> H and <sup>13</sup> C NMR spectra of complex <b>4</b> .....  | S8  |
| IR and ESI-MS spectra of complex <b>4</b> .....                           | S9  |
| <sup>1</sup> H and <sup>13</sup> C NMR spectra of complex <b>5</b> .....  | S10 |
| IR and ESI-MS spectra of complex <b>5</b> .....                           | S11 |
| <sup>1</sup> H and <sup>13</sup> C NMR spectra of complex <b>6</b> .....  | S12 |
| IR and ESI-MS spectra of complex <b>6</b> .....                           | S13 |
| Table S1. Selected bond lengths and angles for complexes <b>1-5</b> ..... | S14 |

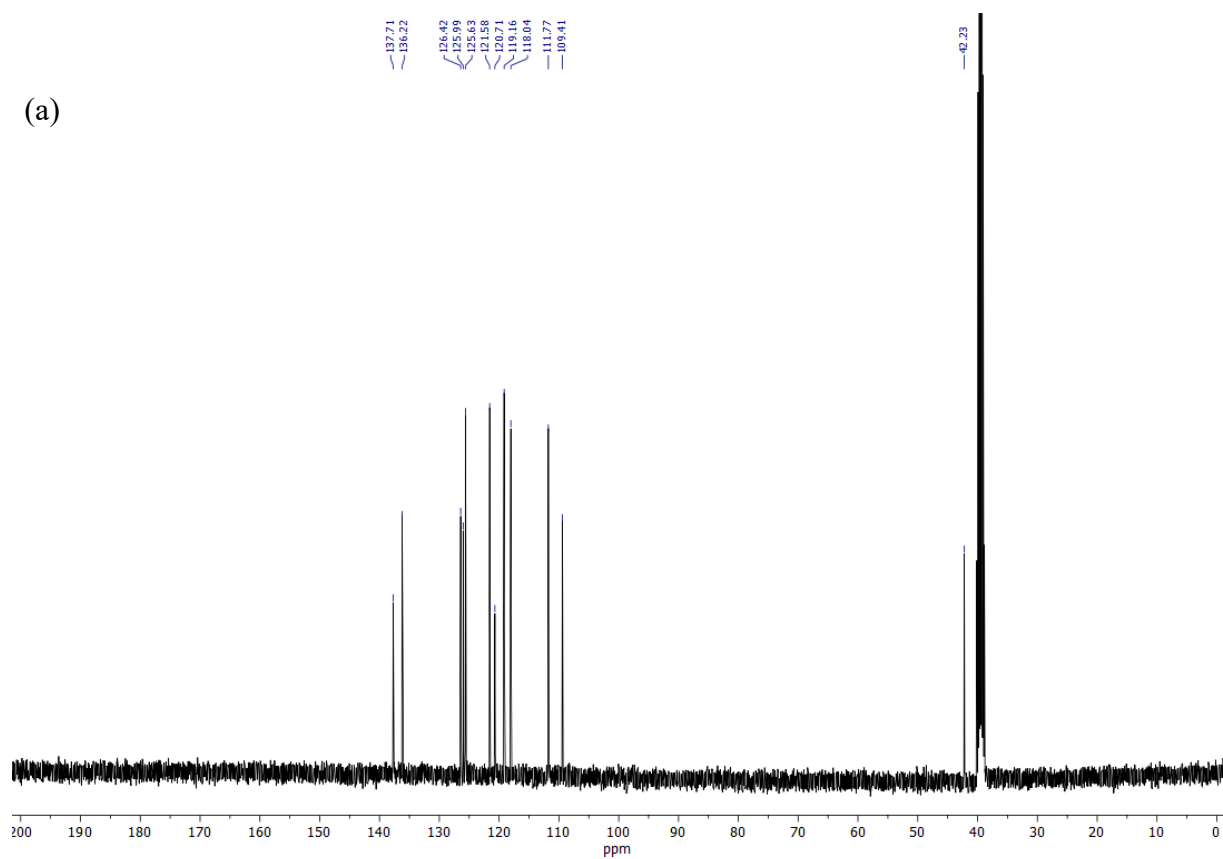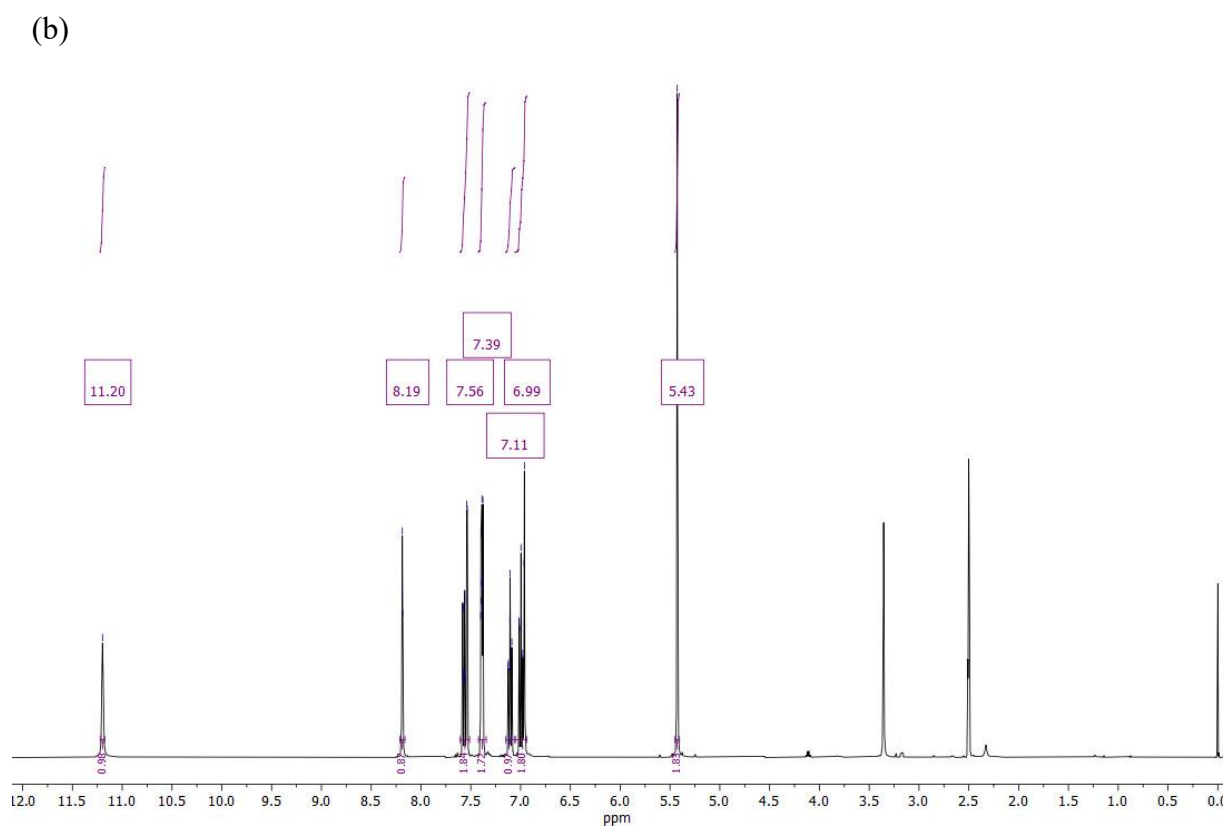

**Figure S1 (a)  $^{13}\text{C}$  NMR spectrum of complex 1 (b)  $^1\text{H}$  NMR spectrum of complex 1**

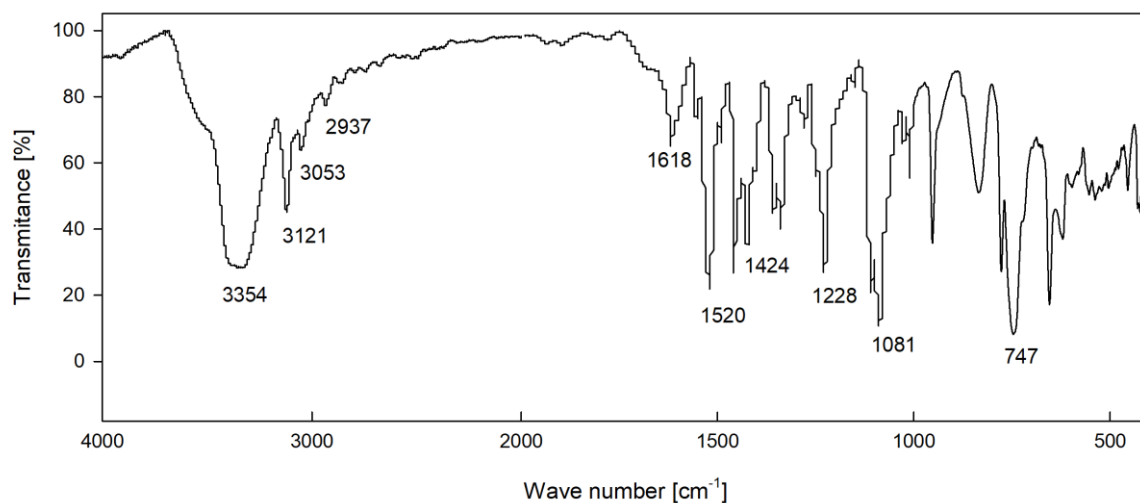

**Figure S2.** IR spectrum of complex 1

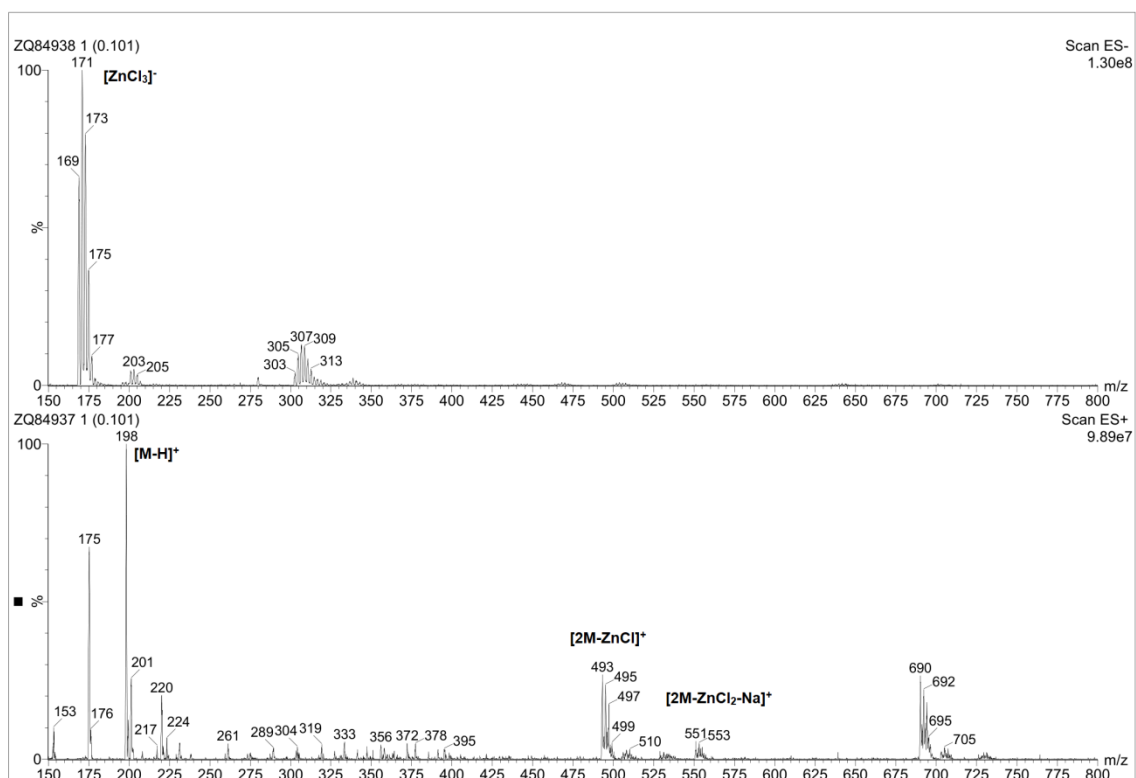

**Figure S3.** ESI-MS spectrum of complex 1

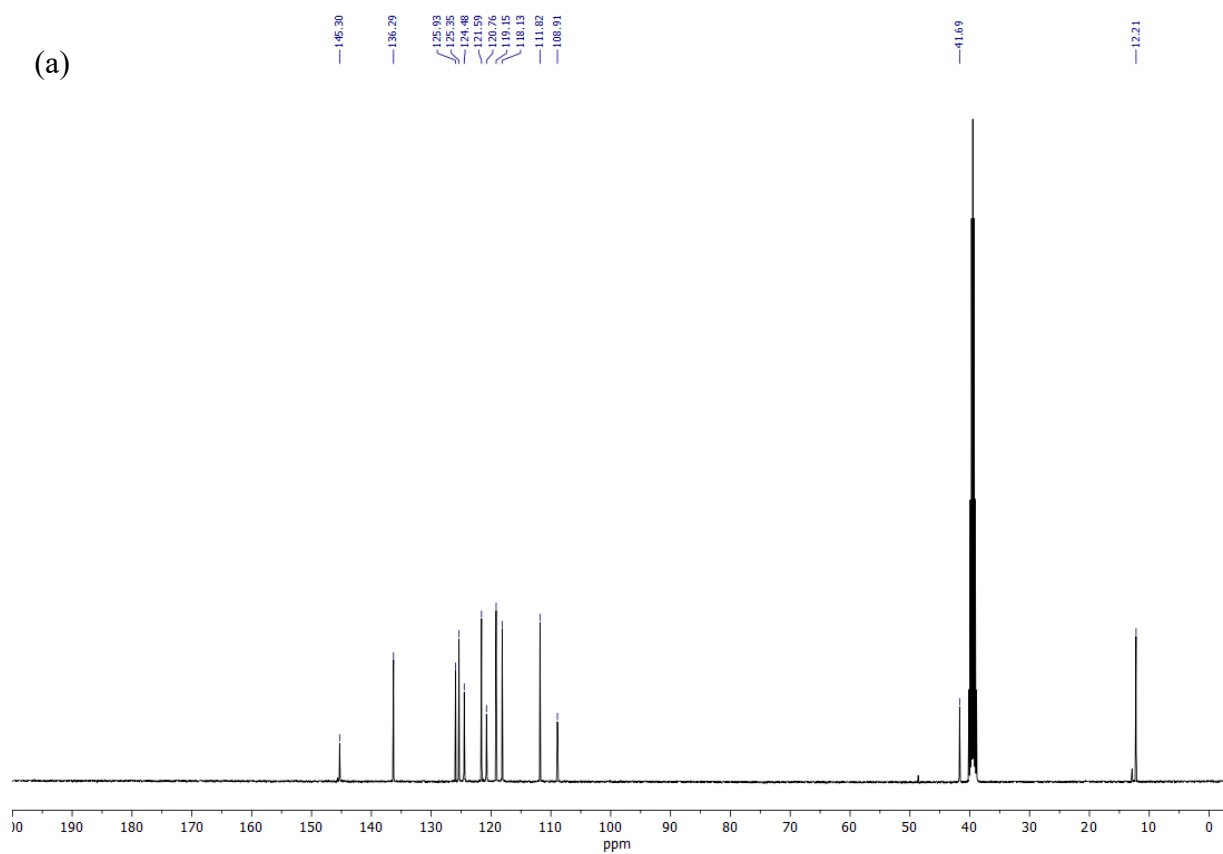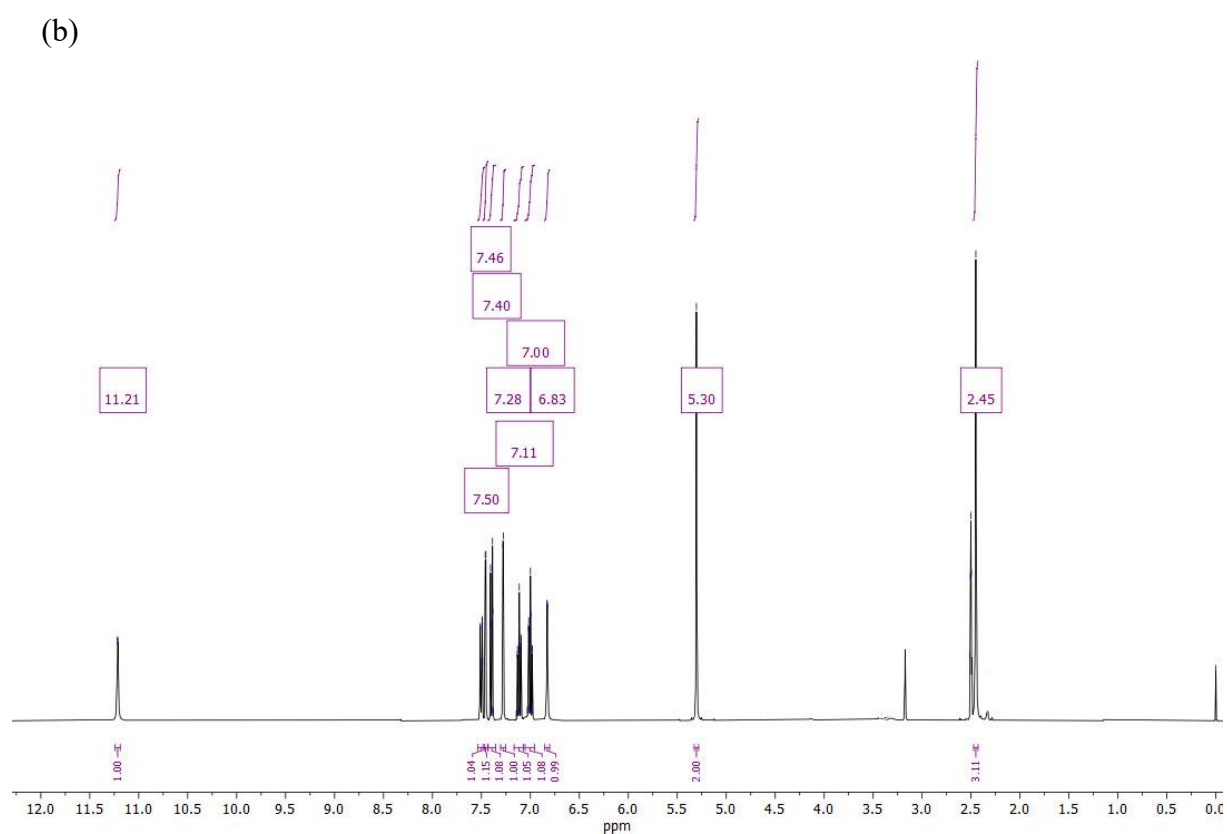

**Figure S4 (a)**  $^{13}\text{C}$  NMR spectrum of complex **2** **(b)**  $^1\text{H}$  NMR spectrum of complex **2**

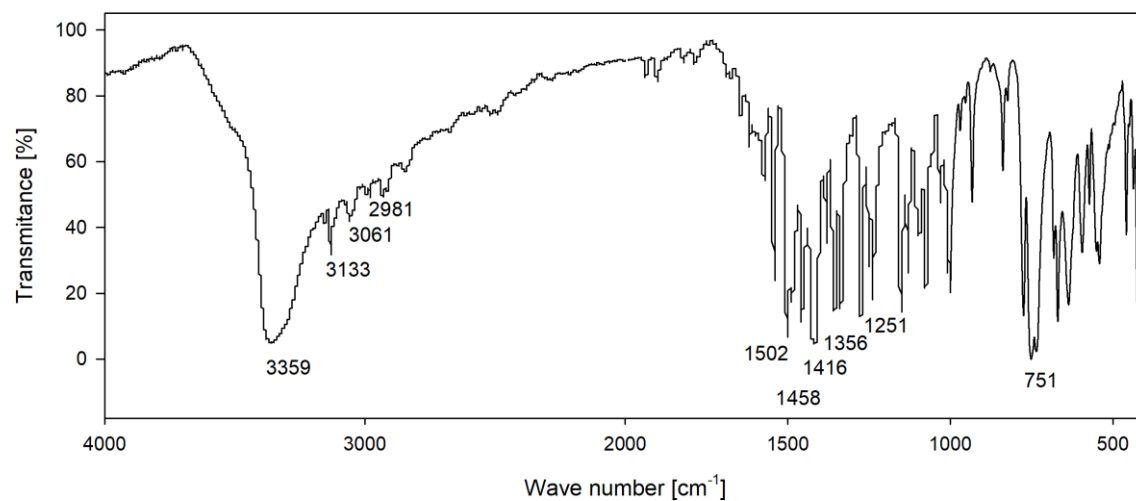

**Figure S5.** IR spectrum of complex **2**

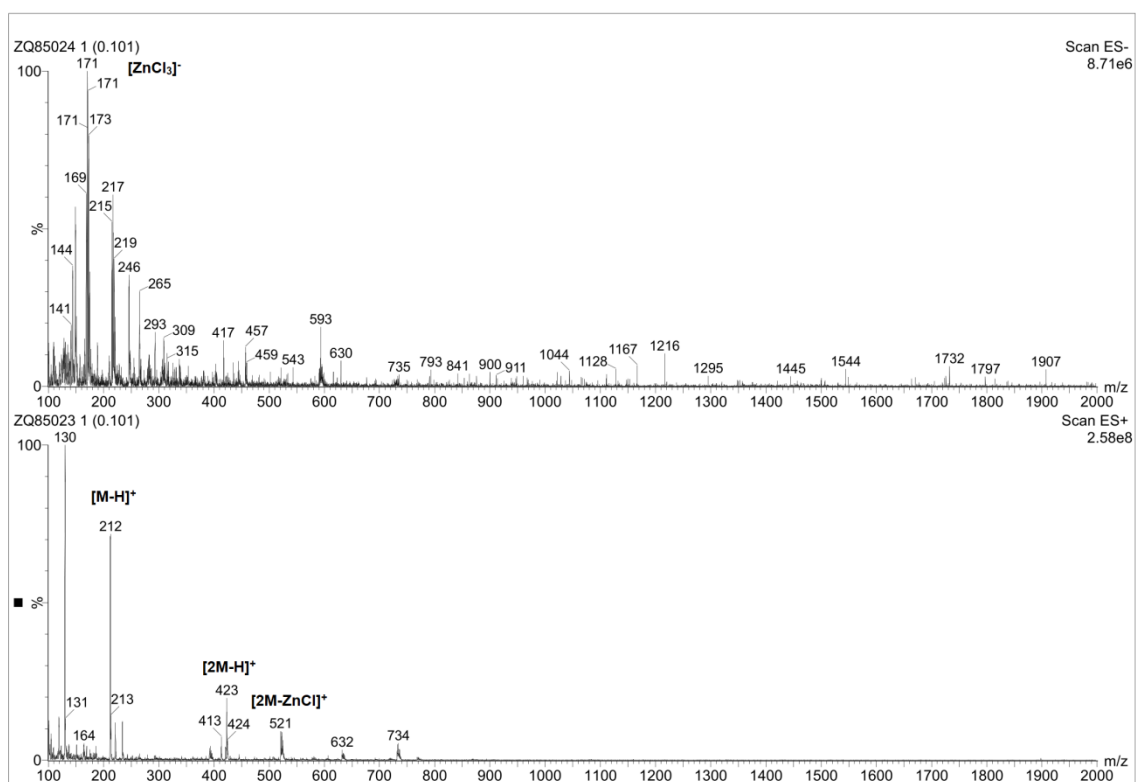

**Figure S6.** ESI-MS spectrum of complex **2**

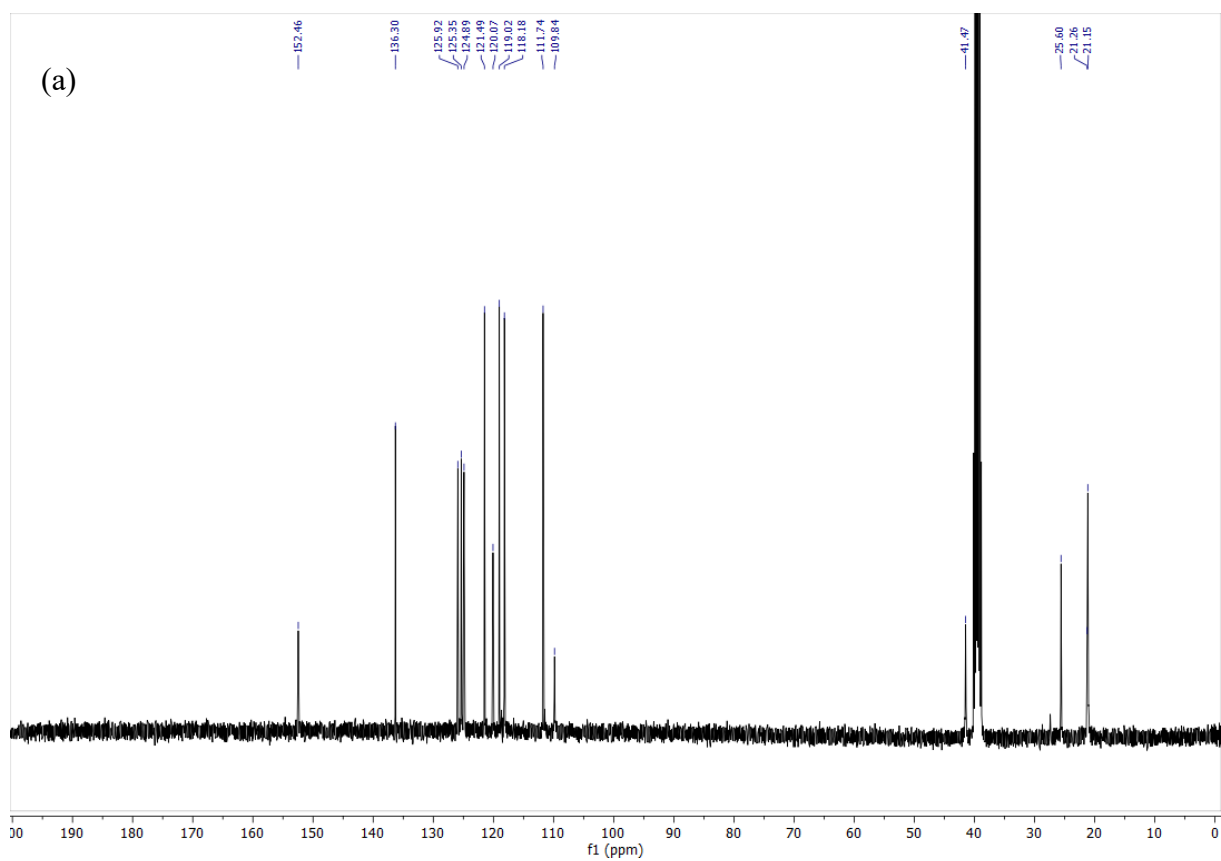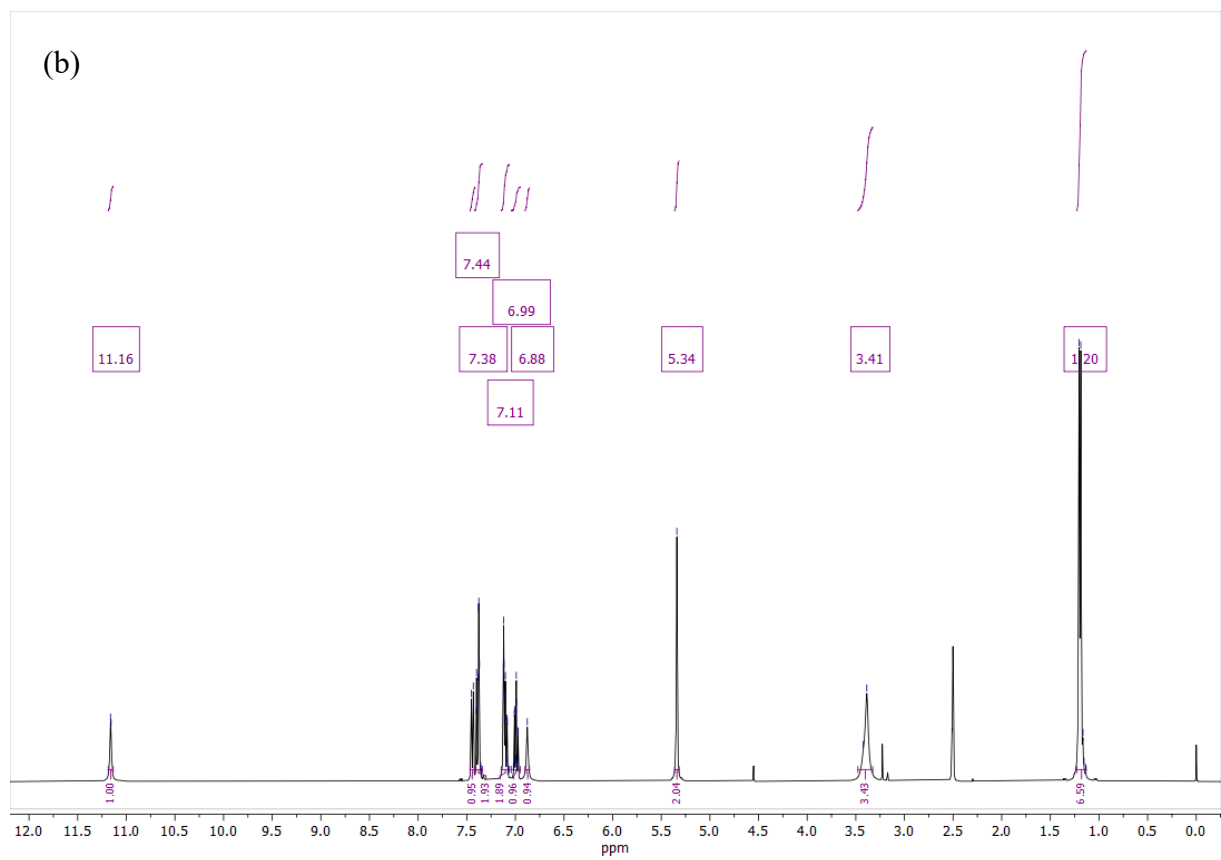

**Figure S7 (a)**  $^{13}\text{C}$  NMR spectrum of complex **3** **(b)**  $^1\text{H}$  NMR spectrum of complex **3**

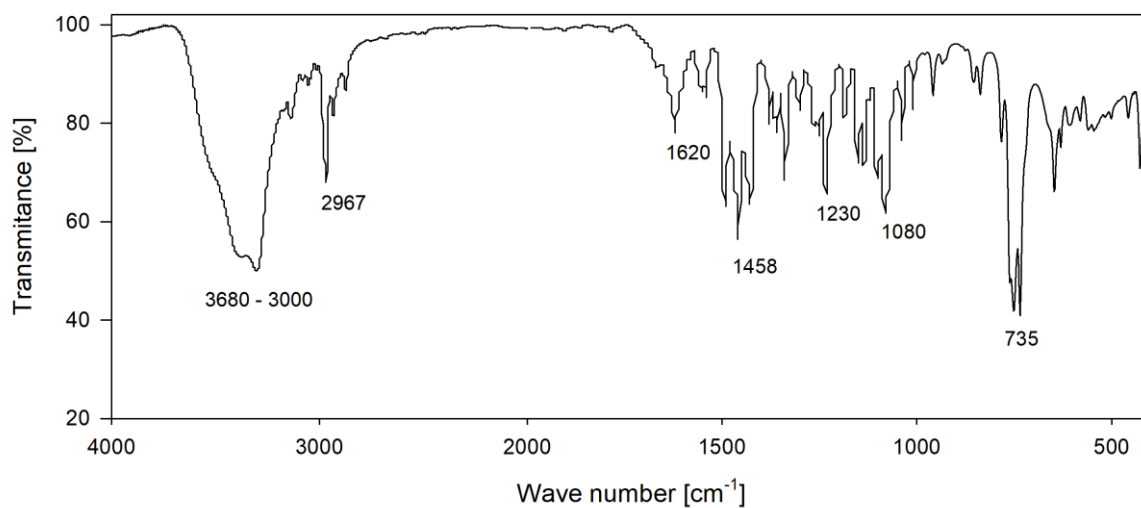

**Figure S8.** IR spectrum of complex **3**

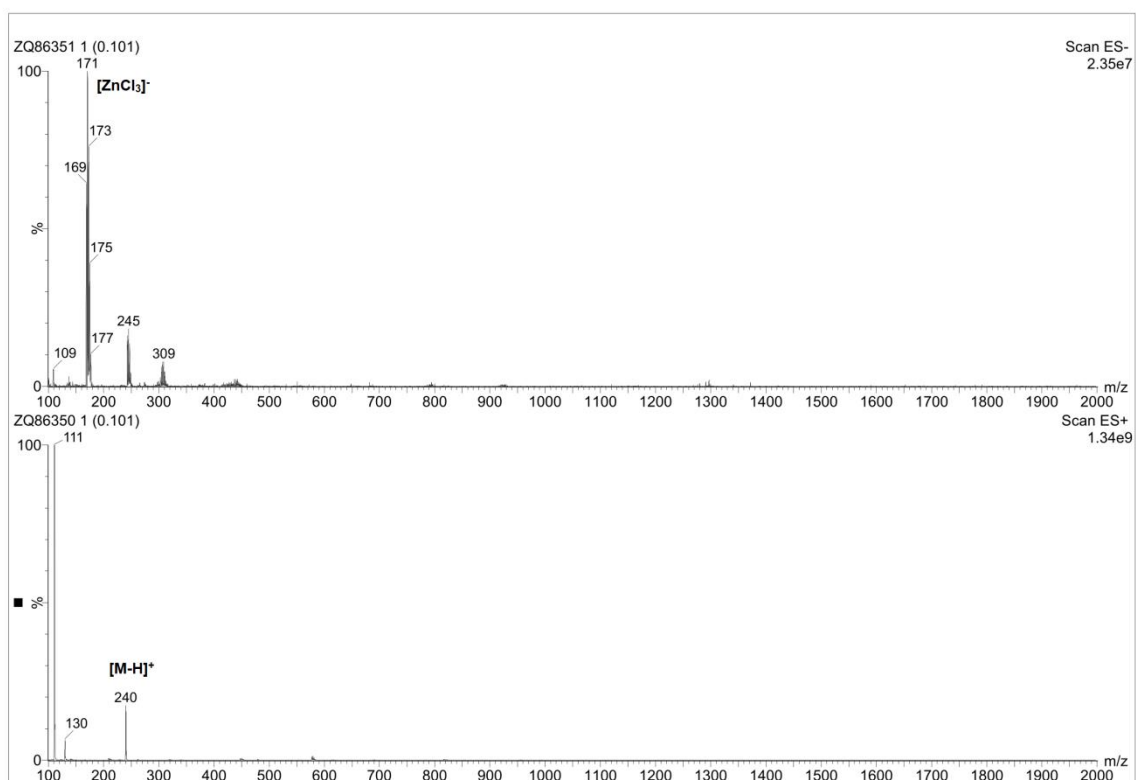

**Figure S9.** ESI-MS spectrum of complex **3**

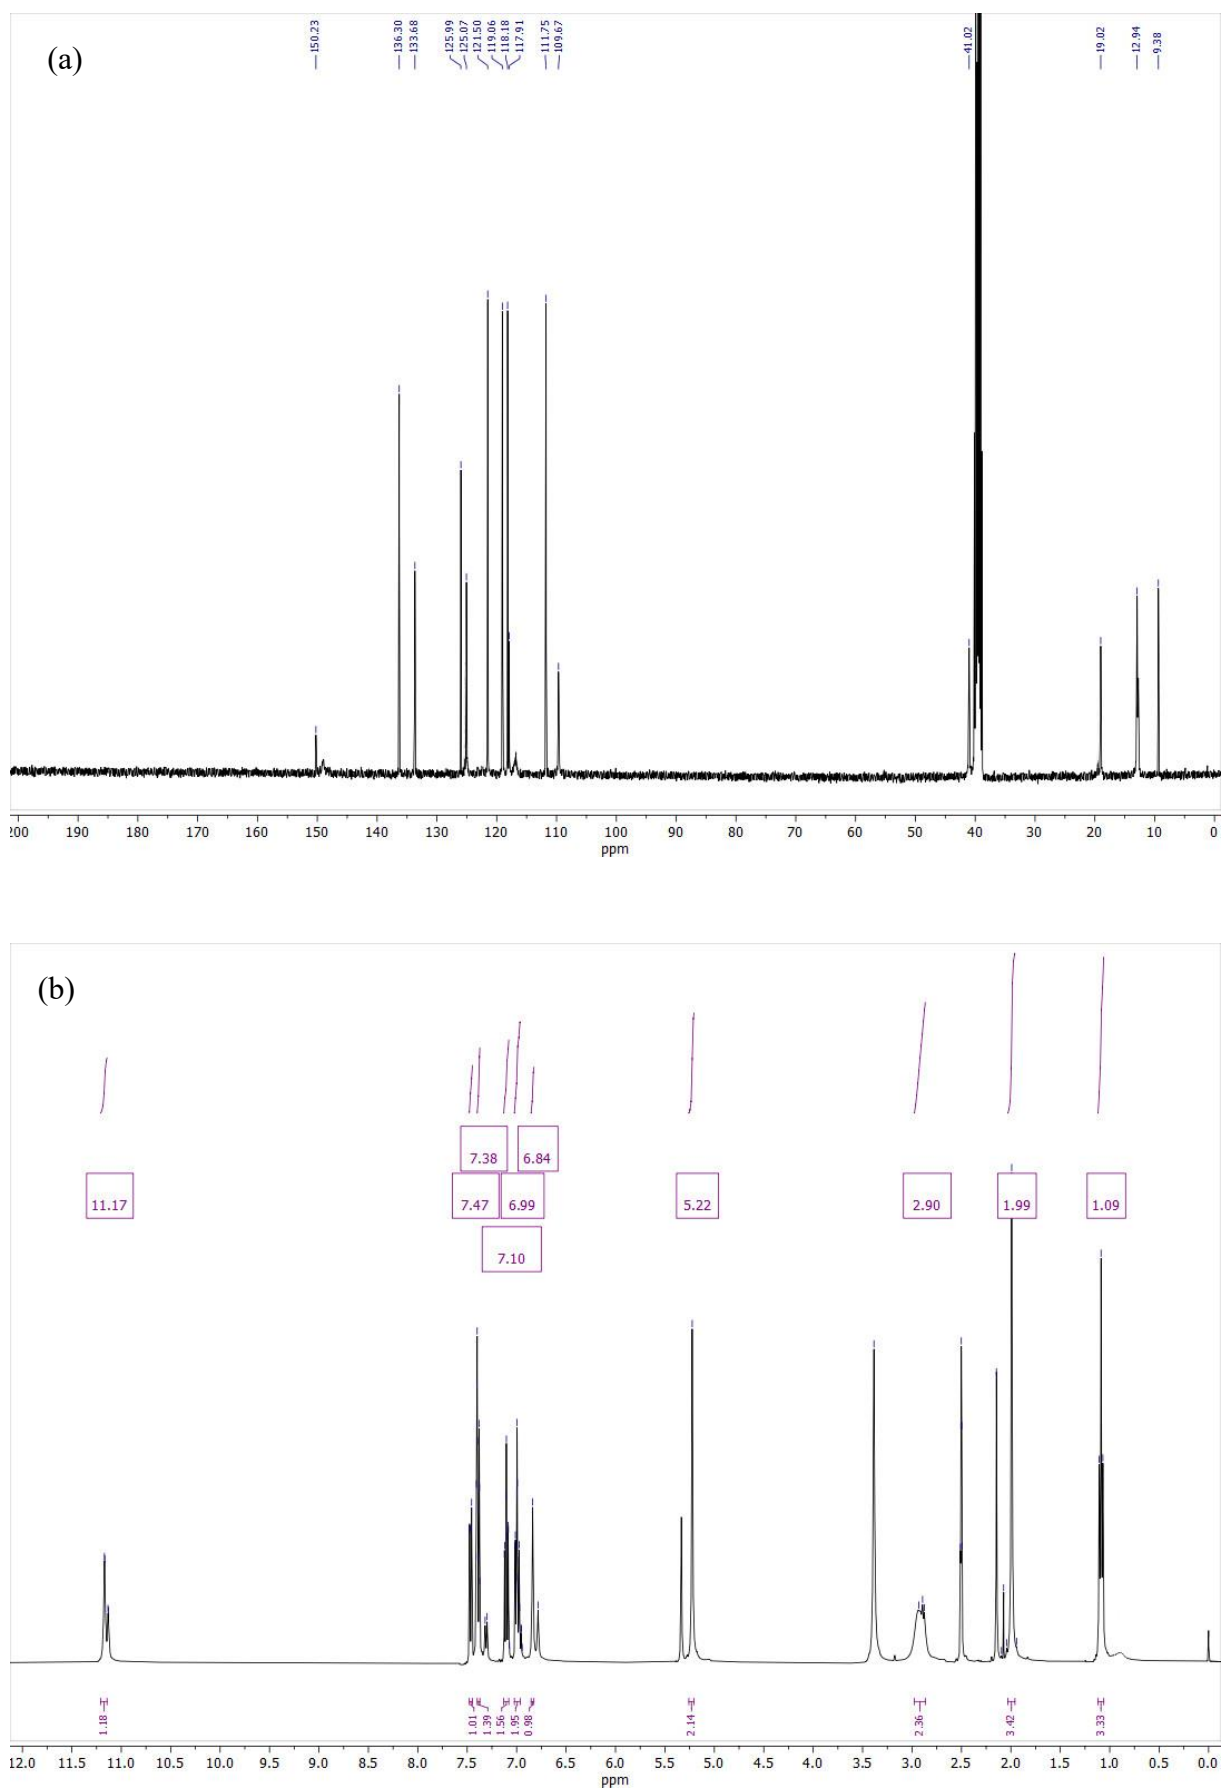

**Figure S10 (a)**  $^{13}\text{C}$  NMR spectrum of complex **4** **(b)**  $^1\text{H}$  NMR spectrum of complex **4**

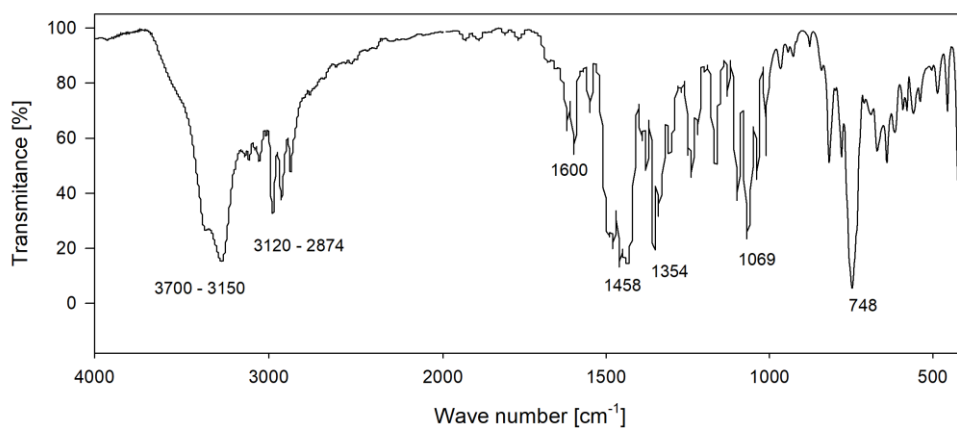

**Figure S11.** IR spectrum of complex **4**

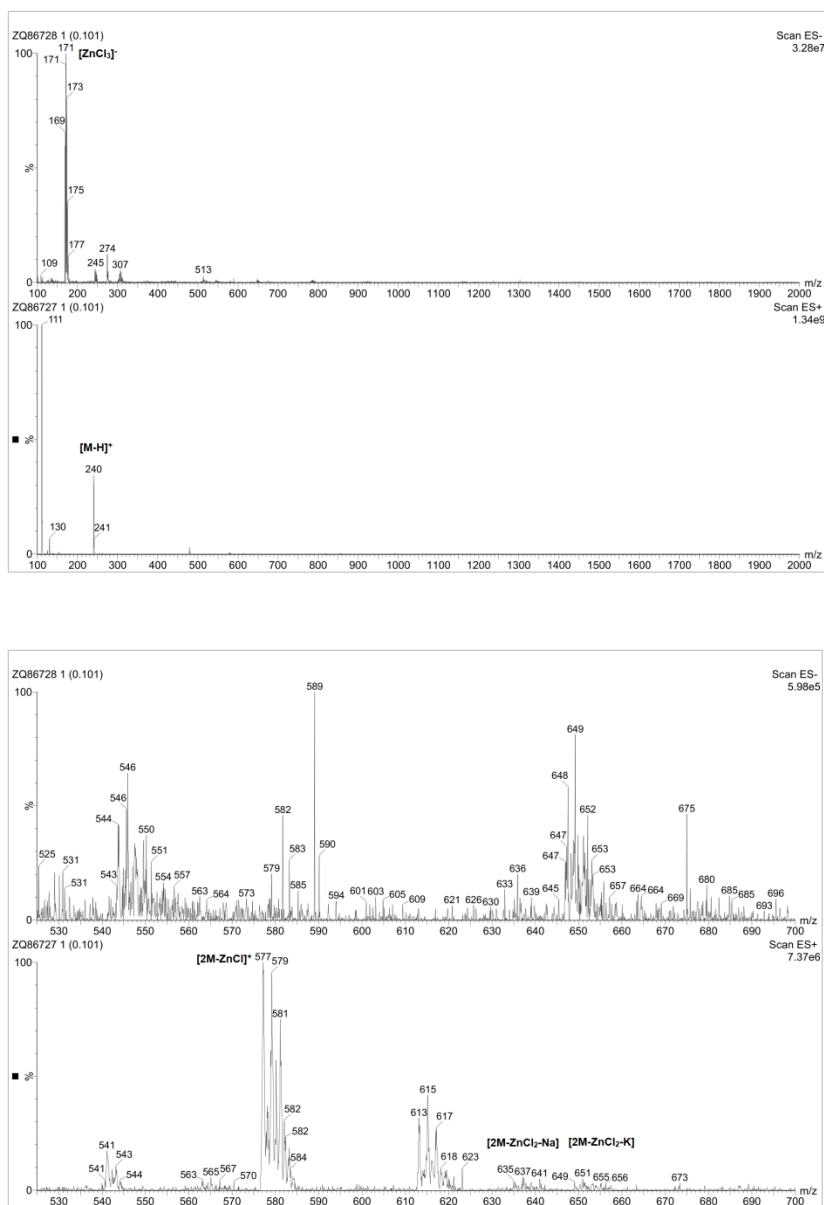

**Figure S12.** ESI-MS spectra of complex **4**

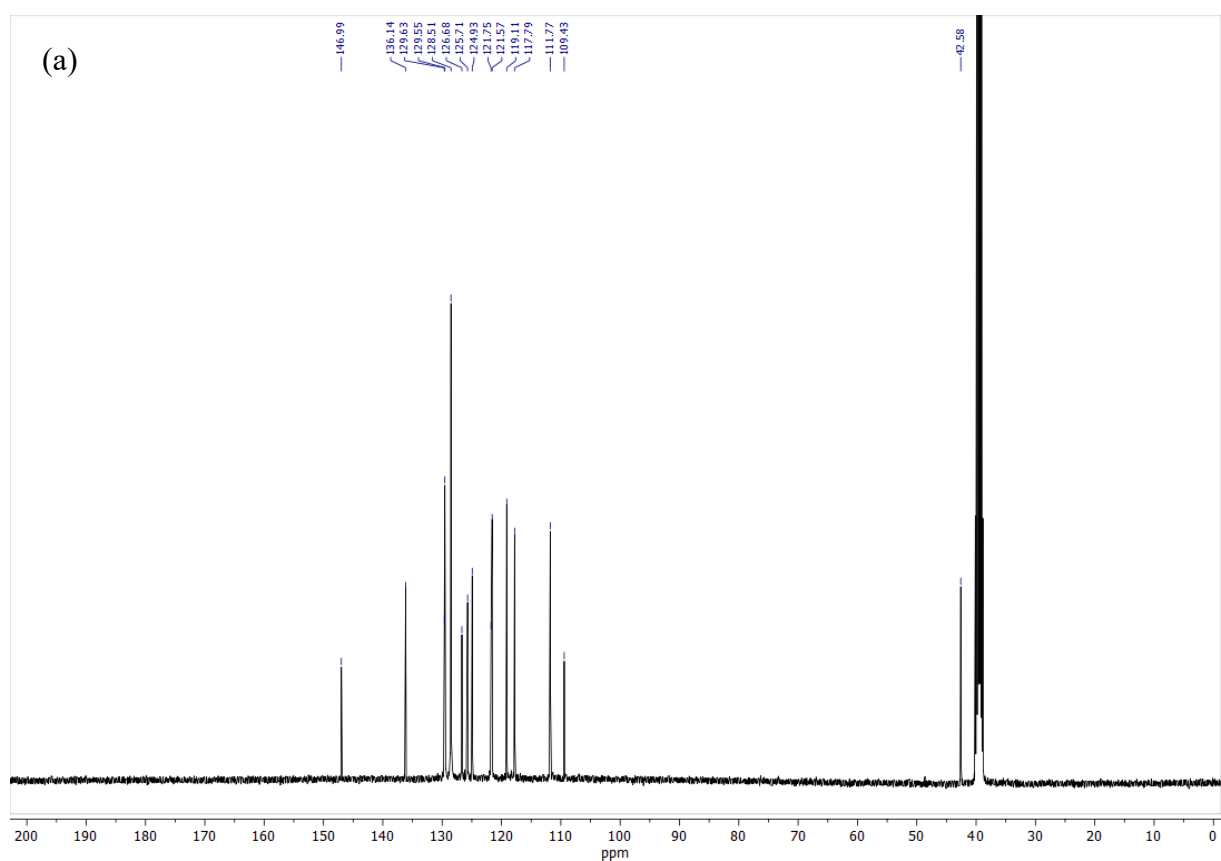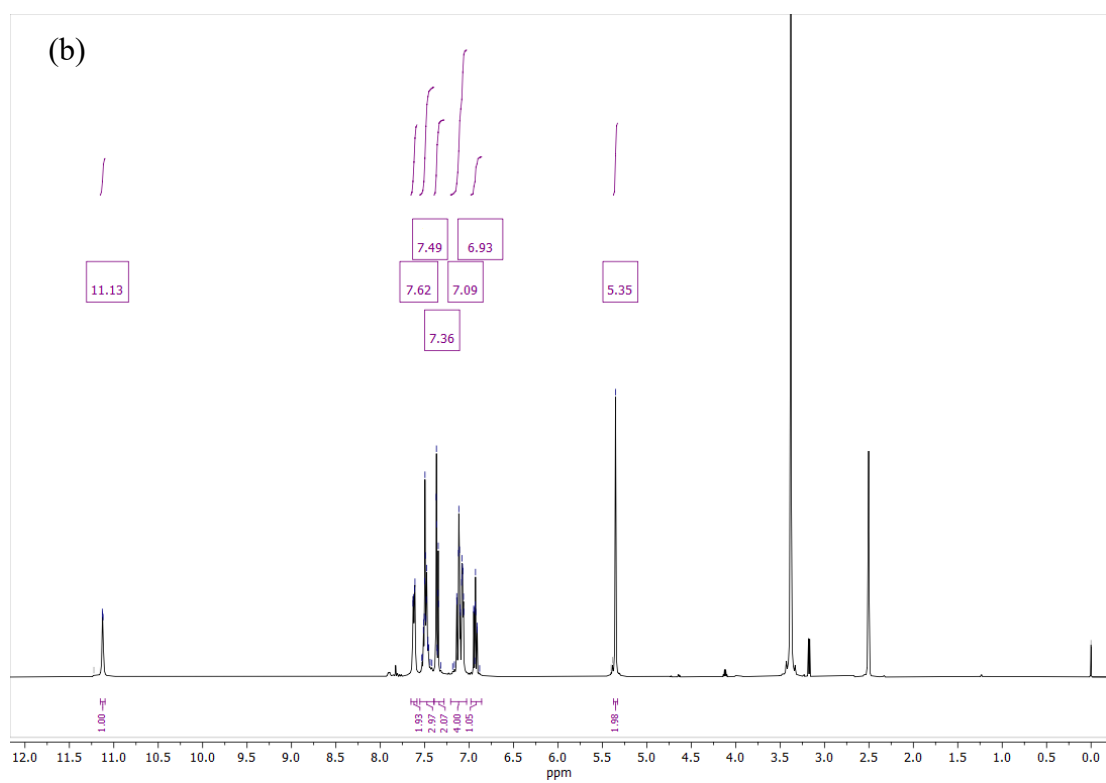

**Figure S13 (a)**  $^{13}\text{C}$  NMR spectrum of complex **5** **(b)**  $^1\text{H}$  NMR spectrum of complex **5**

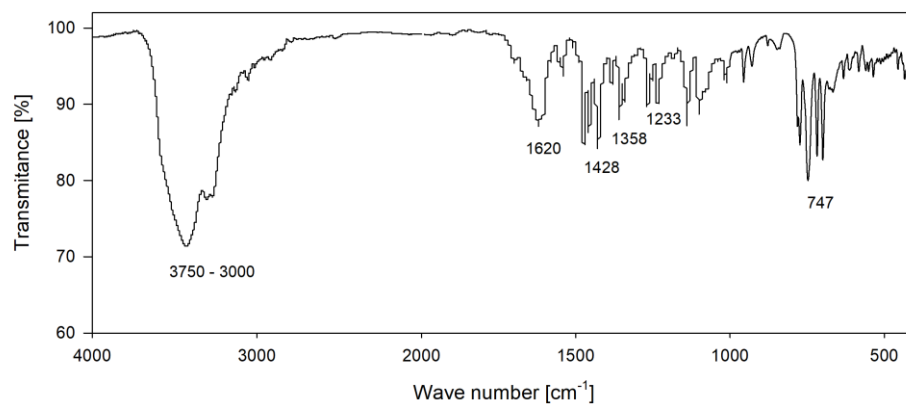

**Figure S14.** IR spectrum of complex **5**

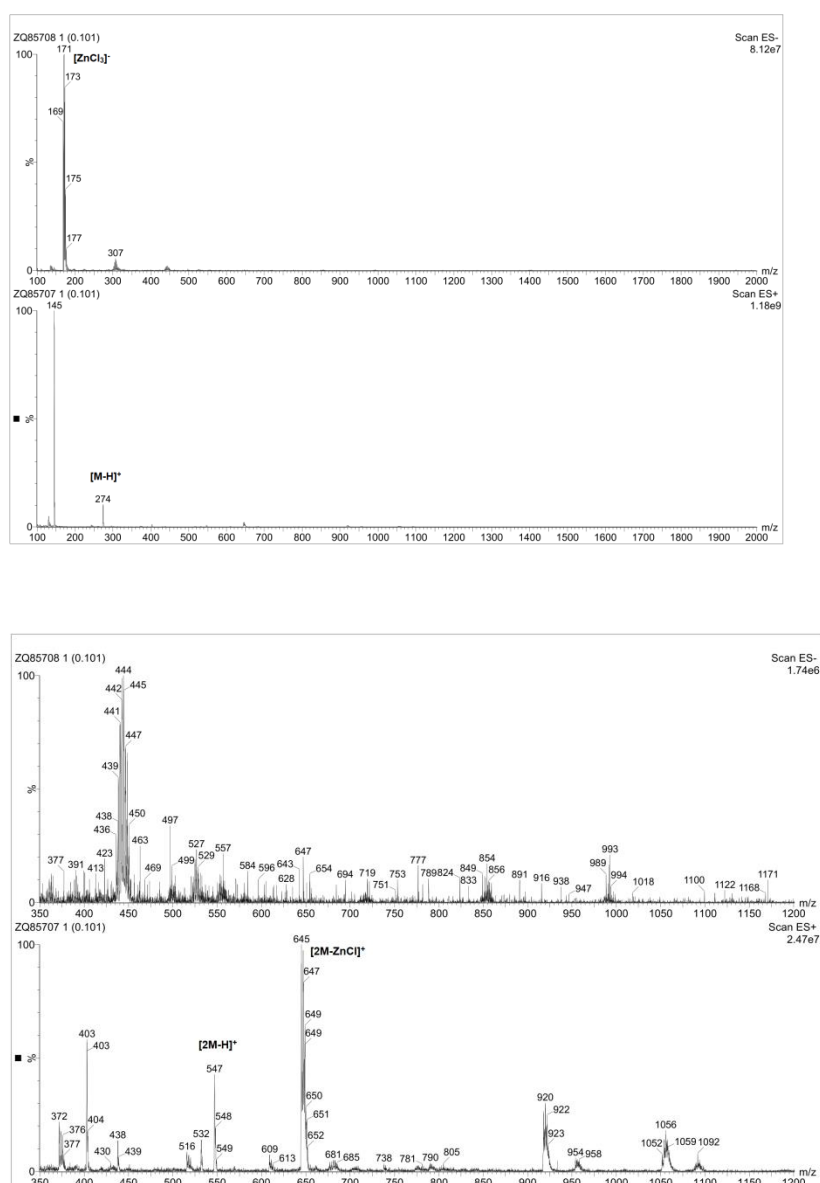

**Figure S15.** ESI-MS spectra of complex **5**

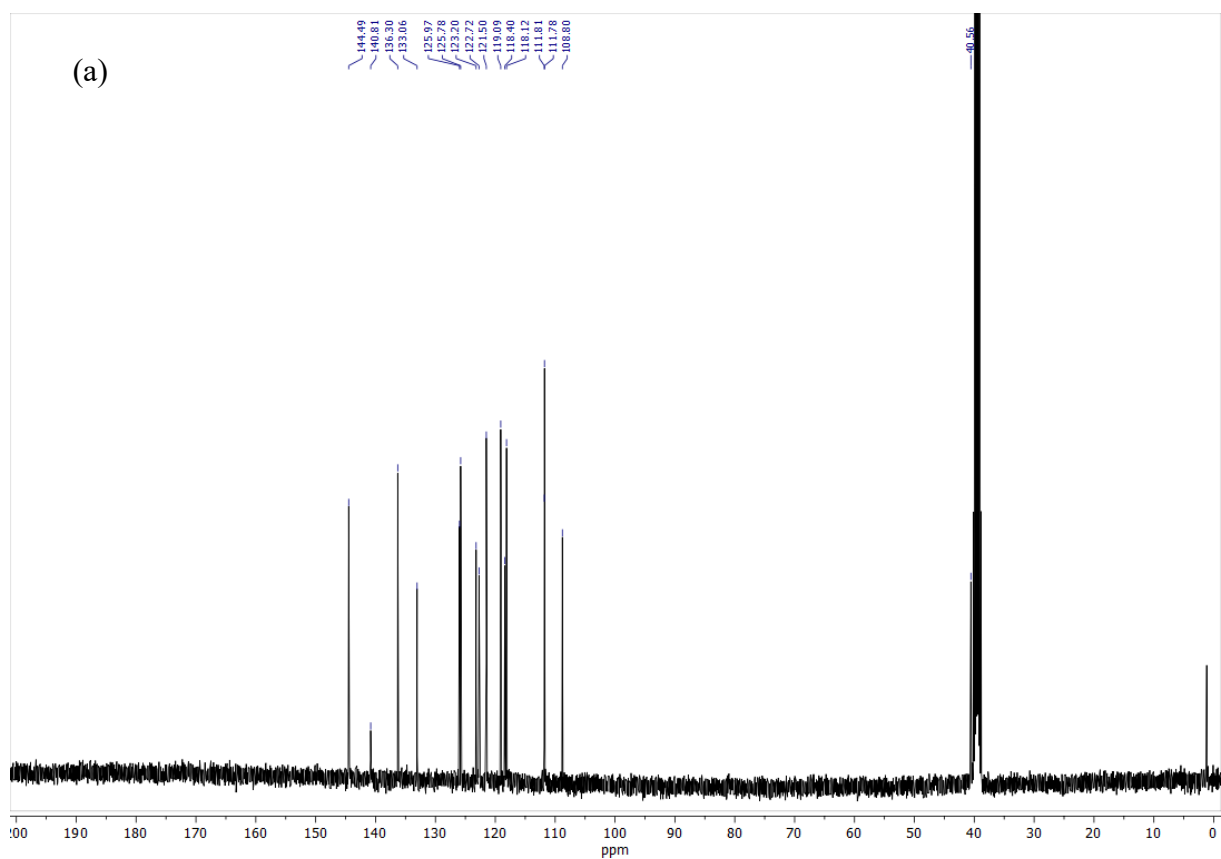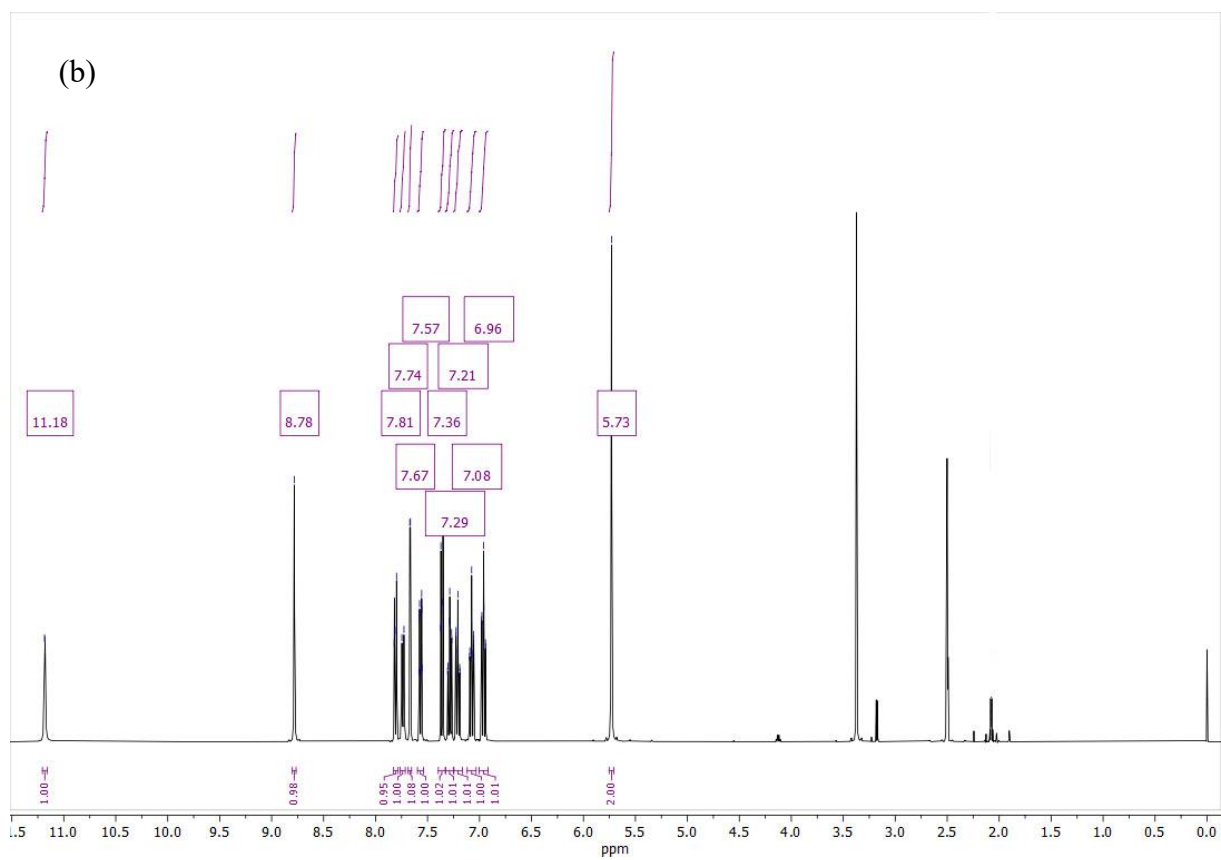

**Figure S16 (a)**  $^{13}\text{C}$  NMR spectrum of complex **6** **(b)**  $^1\text{H}$  NMR spectrum of complex **6**

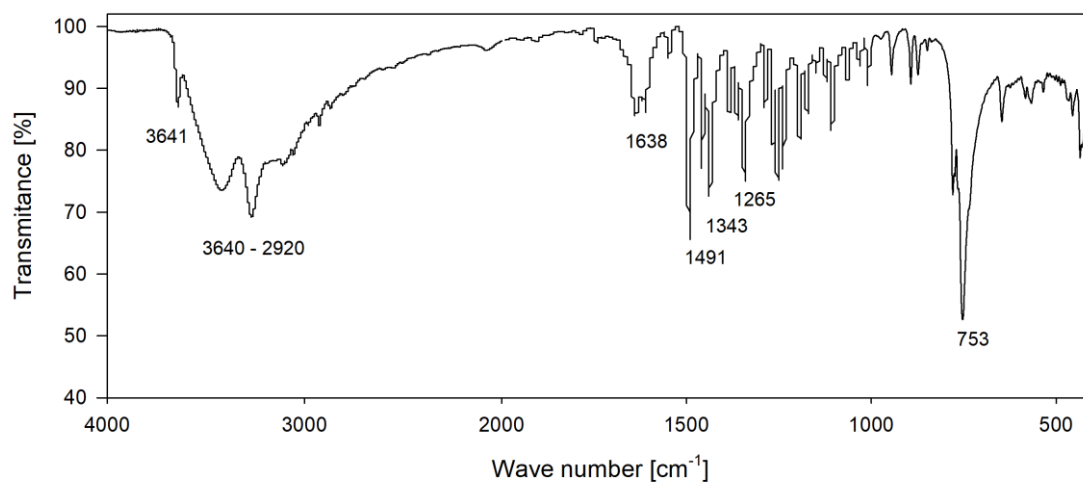

**Figure S17.** IR spectrum of complex **6**

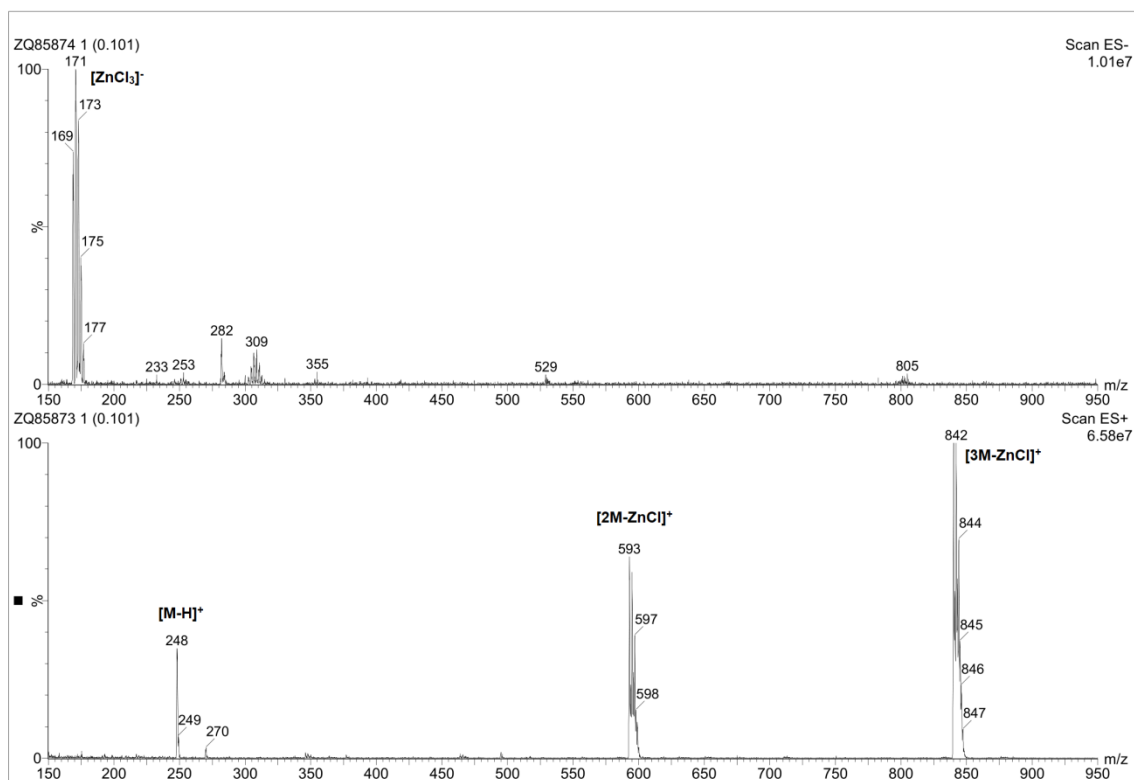

**Figure S18.** ESI-MS spectrum of complex **6**

**Table S1.** Selected bond lengths (Å) and valence angles (°) for complexes **1-5**.

|                                                  | <b>1</b>    | <b>2</b>    | <b>3</b>                   | <b>4</b>    | <b>5</b>                   |
|--------------------------------------------------|-------------|-------------|----------------------------|-------------|----------------------------|
| Zn1—N3<br>Zn1—N23                                | 2.007 (3)   | 2.0140 (19) | 2.020 (3)<br>2.020 (3)     | 2.022 (4)   | 2.000 (2)<br>2.005 (3)     |
| Zn1—Cl1<br>Zn1—Cl2                               | 2.2458 (9)  | 2.2607 (7)  | 2.2257 (14)<br>2.2348 (14) | 2.2594 (15) | 2.2543 (12)<br>2.2508 (12) |
| N3—Zn1—<br>N3 <sup>i</sup> (N23)                 | 105.83 (14) | 110.53 (11) | 102.68 (12)                | 108.9 (2)   | 112.56 (11)                |
| N3—Zn1—Cl1<br>N23—Zn1—Cl2                        | 111.16 (8)  | 112.31 (6)  | 110.05 (10)<br>110.27 (10) | 106.37(11)  | 109.38 (9)<br>110.49 (9)   |
| N3—Zn1—<br>Cl1 <sup>i</sup> (Cl2)<br>N23—Zn1—Cl2 | 109.38 (8)  | 107.41 (6)  | 108.97 (11)<br>109.01 (11) | 114.62(12)  | 109.69 (9)<br>106.88 (10)  |
| Cl1—Zn1—<br>Cl <sup>i</sup> (Cl2)                | 109.89 (5)  | 106.87 (4)  | 115.13 (6)                 | 106.19 (10) | 107.68 (5)                 |

Symmetry code(s): (i) -x+1, -y+1, z (for complexes **1** and **2**); -x+1, y, -z+3/2 (for complex **4**).
